# Supplementary material for: Anthropometric Study of Three-Dimensional Facial Morphology in Malay Adults
Source: PLoS One. 2016 Oct 5;11(10):e0164180. doi: 10.1371/journal.pone.0164180 (PMC5051712; doi:10.1371/journal.pone.0164180)
Supplement: S2 Table — (XLSX) [file pone.0164180.s002.xlsx]

## Sheet: malay male
ID	age	(exR-exL)	exR-enR	exL-enL	enR-enL	(sn-prn)	(alR-alL)	(n-sn)	(n-prn)	(sbaR-sbaL)	(sn-sto)	(chR-chL)	(cphR-cphL)	(sn-ls)	(ls-sto)	sto-li	n-gn	sn-gn	g-sn-pog	ULA-sn-col	cp-pog-sn	alR-alL/chR-chL	sn-gn/n-gn
17	24.24	100.91	31.05	31.28	40.21	19.565	38.09	57.95	46.26	18.965	23.015	48.02	11.79	14.31	11.23	12.48	119.555	62.49	174.72	112.425	115.32	0.793211	0.522688
36	22.92	96.42	27.66	29.42	40.42	13.69	39.15	60.31	54.33	17.59	25.9	52.79	12.25	15.64	10.32	11.76	132.23	76.52	160.81	117.93	102.57	0.741618	0.578689
37	23.33	93.865	28.43	28.95	37.745	18.65	39.98	55.325	46.68	16.265	23.37	53.765	11.36	13.78	11.155	9.88	117.585	64.83	164.91	111.62	105.26	0.743606	0.551346
57	29.83	93.31	29.4	29.02	36.21	19.59	41.71	58.42	49.45	20.54	24.98	53.94	14.92	18.19	10.16	9.11	128.83	72.31	170.69	97.24	121.89	0.773267	0.561282
58	24.17	91.95	28.39	29.19	34.82	17.16	41.89	54.74	48.26	16.66	24.75	50.72	13.61	15.87	10.02	8.94	113.81	61.19	168.51	107.83	118.62	0.825907	0.53765
62	23.25	93.36	28.53	30.11	35.5	19.59	36.47	52.74	43.62	19.16	20.86	47.1	10.42	11.98	10.76	11.6	116.31	64.83	174.72	95.79	118.12	0.77431	0.55739
69	23	95.12	32.05	29.69	35.78	16.32	37.95	52.17	45.95	15	20.46	53.49	11.96	10.71	11	11.28	119.95	71.81	167.62	105.16	115.41	0.709478	0.598666
79	21.67	98.81	29.25	31.68	39.66	18.01	44.34	53.16	46.84	14.46	26.12	53.37	14.34	17.25	9.8	10.82	119.54	70.52	162.644	113.54	119.07	0.830804	0.589928
81	27.92	95.09	29.38	30.24	37.4	14.37	35.88	49.84	44.48	15.34	23.68	42.2	8.64	13.7	11.97	13.64	116.45	70.48	160.74	104.98	131.96	0.850237	0.605238
92	21.92	94.964	29.47	31.11	35.8	14.74	39	47.35	42.03	14.9	26.79	52.64	10.45	13.78	14.05	10.69	112.69	69.31	162.36	114.97	113.38	0.740881	0.61505
111	21.75	98.49	30.39	31.26	38.63	18.1	40.97	58.83	49.26	18.82	20.61	53.23	13.16	11.03	10.9	14.27	123.88	72.25	159.49	115.66	126.56	0.769679	0.583226
147	20.33	95.07	31.51	29.27	36.76	20.19	45.17	57.41	45.98	17.78	22.16	50.38	10.37	14.51	9.96	13.28	119.53	63.19	171.89	93.7	114.75	0.896586	0.528654
158	25	97.22	31.83	30.18	37.17	17.14	41.59	55.94	49.21	18.01	21.41	54.65	12.39	14.01	10.01	8.62	122.65	72.97	166.17	103.21	121.33	0.761025	0.594945
162	23	100.03	28.93	33.26	39.63	18.93	38.12	56.16	49.53	14.04	24.57	53.43	13.46	14.28	12.04	11.21	131.1	77.58	172.72	102.43	106.35	0.713457	0.591762
167	22.08	89.23	28.33	28.23	34.45	17.8	37.92	51.47	45.57	16.22	21.5	51.47	11.22	13.84	9.89	9.68	121.08	71.01	178.87	90.36	103.29	0.73674	0.586472
168	21.67	98.41	30.03	32.44	37.04	16	37.85	54.02	47.47	17.77	23.19	49.65	11.71	16.09	8.38	6.93	112.34	61.69	159.26	102.34	130.53	0.762336	0.549137
169	22.25	108.04	37.5	37.25	37.22	19.67	41.12	57.26	47.81	15.43	25.93	52.5	14.13	16.7	11.07	11.92	128.84	74.71	166.39	106.47	111.4	0.783238	0.579867
170	22.08	92.78	30.11	31.25	32.38	14.53	39.3	50.96	44.9	20.99	21.45	45.42	12.68	16.87	5.9	9.4	111.53	64.95	160	111.9	115.41	0.865258	0.582355
171	27.83	97.84	32.48	32.8	34.77	18.88	44.57	49.29	39.04	21.24	18.47	52.33	14.57	10.33	10.25	9.55	114.57	66.82	174.69	101.32	106.36	0.85171	0.583224
173	23.83	98.97	30.03	31.59	38.99	15.76	42.18	45.62	39.35	18.87	22.4	52.33	13.8	15.68	7.63	8.13	112.7	70.48	162.24	119.4	114.7	0.806039	0.625377
174	21.58	102.03	32.07	34.16	39.05	16.06	40.78	54.79	49.3	19.76	23.41	59.72	10.57	12.78	12.06	10.63	122.58	70.03	166.83	102.49	121.39	0.682853	0.5713
175	21.5	95.87	32.41	30.89	33.55	16.74	38.97	46.61	40.61	18.02	21.53	47.83	10.63	12.15	11.17	11.54	117.89	73.75	172.32	105.5	112.7	0.814761	0.625583
177	25	107.24	34.63	37.81	38.64	17.48	41.72	55.38	47.46	20.69	25.07	50.88	10.99	17.67	9.08	8.83	130.89	78.16	164.62	109.06	121.6	0.819969	0.597143
190	21	93.85	29.19	30.08	35.66	16.81	40.73	49.38	43.17	18.15	25.42	56.86	14.35	16.4	10.36	12.85	119.84	75.11	161.45	104.19	113.56	0.716321	0.626752
191	20.17	94.01	32.12	30.66	32.59	15.78	37.05	48.4	42.36	16.34	20.12	47.75	9.9	11.83	9.87	5.54	106.4	61.24	163.82	105.44	110.58	0.775916	0.575564
205	26.42	93.6044	30.8829	29.0271	35.5617	18.6453	38.1511	53.6631	44.5843	17.4337	21.229	42.165	8.37209	11.736	12.3987	8.98166	119.335	68.4478	164.024	95.0551	121.17	0.904805	0.573577
206	25.33	100.403	32.9987	34.2632	34.8136	16.4988	43.0558	53.2817	48.297	19.6068	23.7103	56.9577	12.8711	15.1585	10.2186	9.03056	120.699	68.994	173.93	90.0539	111.219	0.755926	0.57162
207	20.92	91.7643	30.7095	30.9156	31.9411	17.8044	38.1196	58.7785	50.5721	19.4573	22.0982	45.6917	8.90058	11.3504	13.274	13.5304	126.845	71.1408	167.109	100.91	120.384	0.834278	0.560848
208	22.42	89.8207	28.4248	29.4799	33.0776	15.3234	37.1314	50.3669	46.7786	16.9997	22.1526	52.7623	12.0911	16.314	6.1625	7.39456	110.831	64.7195	162.832	114.581	116.601	0.703749	0.583948
209	22	95.4259	29.282	29.8263	38.3441	17.394	41.4231	49.2982	44.0215	18.9416	24.4033	51.3452	16.6086	18.5187	8.01088	10.0986	116.818	69.2097	170.682	94.363	116.387	0.806757	0.592457
210	22.17	95.2285	31.3752	32.0874	33.3646	17.4411	36.0977	54.8927	48.6787	19.0839	23.0957	47.1748	9.41121	15.5202	8.64731	8.34047	122.024	69.3203	168.19	113.186	118.184	0.76519	0.568087
211	22.5	103.946	35.6559	34.8203	34.9432	15.2881	38.4482	52.2968	44.047	14.8076	24.5803	51.9437	14.1034	17.0023	11.2445	10.0488	120.518	70.2702	174.093	103.53	106.813	0.74019	0.583068
214	20.67	95.5297	30.491	31.6773	35.4327	17.7654	39.3998	55.8533	47.3117	19.3802	19.9595	49.9925	9.10806	10.1493	10.9308	8.36443	120.889	67.3972	169.509	105.981	115.431	0.788114	0.557513
215	20	93.3691	29.0091	30.5002	35.0616	16.3384	40.6186	57.0339	50.184	20.4102	20.2255	49.892	9.04702	10.2291	12.5448	8.48282	121.871	67.8461	165.432	87.6493	125.717	0.814131	0.556704
216	20.08	93.3411	31.4733	29.9229	33.6759	20.8451	38.748	55.8956	45.6145	18.5784	23.8159	51.1873	10.2575	14.5186	10.6793	9.82791	124.33	72.652	160.341	116.158	121.796	0.756985	0.584348
217	20.25	95.7099	31.1673	31.4898	33.833	14.826	41.4707	50.4541	44.739	21.2699	18.5949	54.8117	12.8843	12.8857	8.08164	9.09458	115.54	67.5061	167.91	99.3808	118.181	0.756603	0.584266
218	20.08	100.146	30.7562	32.2952	39.4656	19.395	38.3762	58.5942	50.6691	18.5719	22.0295	58.4057	13.6937	12.6762	12.0259	11.6032	120.935	67.1599	161.192	117.247	116.299	0.657063	0.555339
219	20.08	91.0529	30.5867	30.0063	31.7855	15.4784	39.0315	50.6001	45.6685	21.0218	22.2922	44.3365	10.9481	16.4413	7.7346	8.00475	112.24	63.8244	168.836	102.706	108.295	0.880347	0.568642
220	20.42	88.2342	30.118	30.056	30.0943	16.1021	36.3571	55.6378	49.6055	20.3461	20.148	49.4241	10.5966	9.53352	11.0817	9.08864	113.106	61.6967	156.348	117.588	121.408	0.735615	0.545477
221	20	92.9162	30.3555	29.7754	35.7171	17.7185	38.1785	55.7569	47.743	17.961	21.839	50.3713	11.9528	12.5883	10.7502	7.73965	117.597	64.5715	162.654	104.055	123.79	0.757942	0.549091
222	20	96.8203	33.1342	31.9477	33.8771	14.8556	36.1534	52.1457	47.8234	18.2875	24.3455	49.8468	11.5873	14.4617	11.4315	10.923	124.964	76.9731	163.465	104.955	124.592	0.72529	0.615962
223	20.08	87.839	30.5141	29.8473	28.0267	15.6479	40.6856	52.9472	47.4248	19.5673	22.3785	46.7279	8.79218	14.9507	9.3013	8.185	118.096	67.0241	173.161	76.859	118.728	0.870692	0.567539
224	20	103.51	36.2485	35.2598	33.8423	17.2335	41.2282	59.0109	54.6442	18.6725	24.0168	54.9946	11.6309	17.4538	7.26836	7.32076	126.451	70.0866	162.498	111.524	114.881	0.749677	0.554259
225	20.17	91.3917	28.1273	28.7438	35.7389	15.2446	37.6701	55.7798	51.0365	21.5223	19.7756	54.668	12.2044	11.7555	8.74455	9.22965	120.05	67.4185	171.07	103.41	109.845	0.68907	0.561587
231	24.17	97.2049	28.6333	30.249	39.6002	19.6038	40.8814	55.6176	46.3986	19.5076	21.5657	50.5559	13.2324	10.5177	13.6924	10.836	112.716	59.2849	166.498	82.7064	128.517	0.808638	0.525967
239	20.58	98.8524	32.4623	33.6712	34.4118	19.5711	40.2278	60.3712	50.9182	21.9515	20.9087	52.5017	12.4023	13.2243	8.45661	11.3721	125.884	68.9548	160.736	124.859	118.048	0.766219	0.547765
295	21	92.9527	32.3463	31.4491	30.5741	19.6163	40.5095	60.7318	51.5297	20.9227	21.9666	52.177	14.6542	15.0056	8.90061	12.018	127.382	68.5785	167.49	105.569	113.892	0.776386	0.538369
296	21.83	94.2721	31.094	31.2903	33.1058	16.1734	38.2014	52.7251	45.0984	19.1509	24.1768	47.9055	11.6512	15.7295	9.86372	12.2863	120.151	70.3998	167.074	108.063	112.481	0.797432	0.585928
297	21.67	94.5154	28.6874	30.2525	37.0398	19.5951	39.3376	57.1049	49.865	18.4313	21.2798	47.3963	11.0029	12.4879	9.74566	10.9827	121.603	65.9575	169.076	109.182	120.826	0.829972	0.5424
316	22.5	101.124	33.411	31.7261	38.6189	19.7823	42.0214	55.8292	44.4431	24.063	19.749	49.4268	12.3346	14.8025	6.98182	8.60485	114.75	60.0249	171.478	120.65	123.845	0.850174	0.523093
317	22.92	94.8506	29.3936	30.4167	36.0201	15.7874	40.4203	55.7438	49.091	17.9193	24.8757	49.4102	12.7577	15.8584	10.3347	11.1276	126.089	72.246	172.685	96.3182	124.268	0.818056	0.572976
320	20.67	103.678	33.7084	32.3119	39.2381	16.6627	39.92	54.0331	47.6462	19.6589	27.7607	44.1409	8.62835	13.7728	15.656	14.3759	122.631	71.1122	164.314	100.093	117.739	0.904377	0.579888
321	20.33	88.8818	27.2495	29.6964	33.5018	17.4385	38.7329	51.477	43.0445	20.4037	24.6113	48.7041	13.9263	16.9313	11.8047	9.2409	115.464	64.49	177.085	101.608	109.914	0.79527	0.558529
322	20	104.913	34.468	32.4077	38.924	16.2516	34.7303	53.6106	44.0566	18.3161	24.5542	53.2959	10.006	15.2276	11.003	13.7995	121.593	71.4444	164.966	109.897	123.282	0.651651	0.58757
Mean	22.424	96.1537	30.9444	31.3424	35.6386	17.1563	39.547	53.6807	46.6756	18.2613	22.4712	51.0064	11.6948	13.8915	10.3038	9.9737	119.137	68.6608	166.625	104.139	116.84	0.775335	0.576318
StdDev	2.36361	4.62744	2.15261	2.14566	2.78293	1.72653	2.3386	3.64175	3.37768	2.01143	1.99747	3.97196	1.91153	2.42187	1.88036	1.98436	5.48597	4.55353	5.33923	9.64233	6.82557	0.588776	0.830033

## Sheet: malay female
	Age	(exR-exL)	exR-enR	exL-enL	enR-enL	(sn-prn)	(alR-alL)	(n-sn)	(n-prn)	(sbaR-sbaL)	(sn-sto)	(chR-chL)	(cphR-cphL)	(sn-ls)	(ls-sto)	sto-li	n-gn	sn-gn	g-sn-pog	ULA-sn-col	cp-pog-sn	alR-alL/chR-chL	sn-gn/n-gn
53	23.58	90.97	27.51	27.93	37.345	14.19	36.95	48.11	39.36	14.915	20.86	48.12	9.145	11.145	7.175	10.185	107.985	62.005	168.97	108.785	104.52	0.767872	0.5742
21	22	91.60	29.70	29.23	34.12	16.18	39.47	55.9	46.32	19.21	22.48	48.02	12.86	13.4	10.98	10.03	120.38	64.93	178.18	103.23	104.33	0.821949	0.539375
22	23.33	90.04	26.43	26.92	38.16	17.59	39.66	51.86	43.90	18.84	21.56	47.36	11.05	15.40	8.65	10.55	108.57	58.45	171.3	103.86	106.28	0.837416	0.538362
23	23.25	90.66	30.82	28.9	32.23	12.49	34.50	51.61	45.81	20.55	20.91	47.42	12.85	12.83	8.99	10.30	110.21	60.66	166.87	111.46	107.88	0.727541	0.550404
24	25.33	94.18	28.51	29.52	37.13	15.60	39.39	47.74	41.85	16.31	22.61	44.73	10.30	14.98	10.22	9.08	107.74	61.52	172.02	97.18	113.25	0.880617	0.571004
25	24.33	88.775	25.715	25.735	38.095	13.985	34.69	52.62	45.095	15.38	19.135	43.95	10.875	12.64	8.5	11.315	115.375	65.12	170.67	105.995	98.845	0.789306	0.56442
26	22.58	93.77	30.02	29.85	36.01	15.31	38.76	47.23	41.52	14.45	19.46	52.14	11.09	7.81	13.16	11.78	106.92	61.84	176.59	88.71	111.21	0.743383	0.578376
28	22	94.85	27.95	28.47	40.21	17.36	37.05	49.02	39.2	17.38	21.76	47.83	10.23	12.97	11.18	12.14	109.75	62.21	171.01	95.28	110.34	0.774618	0.566834
29	23.83	96.33	30.9	32.77	34.48	13.78	31.03	43.8	38.88	17.21	23.02	48.6	14.76	13.83	11.75	10.36	104.35	63.86	162.96	103.85	119.62	0.638477	0.611979
30	22.67	91.46	26.49	29.5	37.21	16.79	37.21	44.71	38.1	17.24	20.62	51.51	12.05	11.69	10.8	12.04	107.86	65.75	169.51	90.64	115.7	0.722384	0.609587
40	25.17	92.19	29.88	29.65	36	13.15	36.6	45.76	40.46	17.59	24.38	50.15	10.21	13.73	12.38	10.08	112.83	70.79	164.33	96.41	125.35	0.729811	0.627404
41	25.42	81.91	28.36	25.94	28.52	16.17	31.76	47.28	40.99	17.36	19.38	42.78	9.23	11.6	8.58	9.86	110.13	65.06	167.51	92.63	110.64	0.742403	0.590756
56	21.42	92.28	29.14	28.06	36.7	13.86	34.48	47.48	40.05	15.11	19.58	42.19	9.81	13.27	7.36	10.62	110.32	65.36	169.66	108.87	105.53	0.817255	0.592458
68	26.42	90.84	27.9	27.73	36.9	16.13	37.3	51.66	43.32	13.93	23.18	49.42	10.15	15.36	10.16	10.56	114.14	66.7	159.34	115.13	118.73	0.754755	0.58437
74	23.42	93.21	30.63	29.99	33.76	15.58	39.35	49.01	43.74	18.91	24.05	48.38	11.39	14.88	12.36	10.69	118.98	72.56	171.72	93	100.78	0.813353	0.60985
75	28.25	90.47	30.17	28.54	33.32	15.73	38.76	49.92	44.34	20.25	20.29	49.05	11.81	10.16	11.83	10.78	110.96	62.58	173.41	85.04	112.03	0.790214	0.563987
77	21.75	92.48	24.49	31.55	39.41	19.01	35.41	49.24	40.11	17.5	20.98	48.96	11.58	14.38	7.98	8.13	111.08	63.89	171.96	116.43	97.57	0.723243	0.575171
78	21	90.78	28.49	27.23	36.11	20.05	38.19	53.82	46.55	18.6	22.8	48.91	8.16	15.53	9.39	7.39	118.52	66.34	172.52	95.96	111.11	0.780822	0.559737
80	28.58	89.42	30.12	26.79	33.96	18.42	38.71	52.24	43.26	20.04	19.86	43.25	11.12	13.57	7.89	8.42	111.53	60.99	170.45	111.19	113.17	0.895029	0.546848
97	22.92	92.64	28.84	29.51	35.32	14.03	32.56	42.83	36.32	16.98	20.73	43.12	9.42	12.01	10.2	8.05	107.72	66.62	176.87	90.44	117.98	0.755102	0.618455
98	23.5	91.23	27.99	27.89	36.72	13.85	37.48	43.4	38.31	16.42	23.67	46.63	7.65	12.46	12.01	9.06	106.24	66.26	168.9	101.84	107.79	0.803774	0.623682
99	23.33	94.27	29.51	28.56	37.51	18.14	40.12	49.08	39.75	17.44	22.01	46.82	12.17	14.67	9.2	9.33	119.32	72.34	173.33	95.86	116.34	0.856899	0.606269
100	22.92	87.12	26.77	28.441	34.32	16.67	38.38	48.66	42.52	15.48	21.83	49.08	10.58	13.61	10.7	8.63	111.15	66.41	163.4	95.23	114.61	0.781989	0.597481
136	28.75	90.55	29.14	29.48	32.8	16.98	34.59	45.57	38.83	17.57	21.08	52.66	10.96	13.3	9.64	9.53	113.41	71.4	164.77	113.05	106.73	0.656855	0.629574
137	23	93.08	30.42	28.84	35.27	15.52	33.79	50.88	45.35	13.56	25.26	49.76	9.48	16.93	9.67	8.63	118.46	70.26	168.47	102.25	110.15	0.679059	0.593112
138	28.08	97.24	29.09	29.7	39.25	14.58	39.9	48.57	40.86	19.29	21.55	48.69	11.35	14.01	7.76	4.6	110.03	64.6	169.8	127.94	123.17	0.81947	0.587113
140	25.5	88.86	28.44	27.97	34.44	14.02	33.63	44.88	38.43	16.49	20.72	53.45	9.74	10.8	11.36	10.02	108.59	66.33	171.45	108.15	110.52	0.629186	0.61083
155	24.92	93.72	29.38	30.23	36.32	16.13	34.64	46.94	41.96	15.08	24.44	46.77	9.65	14.75	11.9	10.96	108.67	64.96	167.18	88.5	113.19	0.740646	0.597773
156	21.08	89.1231	28.2749	29.7046	32.1735	14.5144	35.007	53.8582	46.6652	18.8113	23.5719	45.3693	7.15343	14.4653	11.6908	13.5139	114.255	64.4282	160.572	102.231	110.818	0.771601	0.563898
157	21.67	88.0777	28.4366	29.5281	32.208	16.5939	34.7443	56.9833	51.6585	17.333	18.4991	49.7375	8.17816	12.9018	6.68108	7.54786	108.08	53.3017	164.166	107.953	122.31	0.698553	0.493169
160	20	88.13	28.21	29.98	31.22	18.91	37.21	49.66	40.33	18.13	21.14	49.61	9.76	10.84	12.15	10.89	113.76	66.67	165.56	110.06	109.82	0.75005	0.586058
161	24.67	91.48	31.49	27.77	33.71	14.71	34.73	47.57	40.3	16.82	18.88	48.45	10.16	12.16	9.64	8.87	106.37	61.47	168.27	110.04	104.63	0.716821	0.577889
163	23.75	92.24	32.04	29.71	32.15	15.03	38.02	47.94	40.22	16.48	20.46	48.45	9.2	14.03	7.8	9.23	109.91	63.7	171.54	113.29	111.61	0.784727	0.579565
164	21.17	89.91	28.18	28.15	35.23	15.34	37.78	46.47	39.04	19.23	21.02	48.67	11.3	12.92	9.56	7.27	111.05	67.77	166.42	103.86	117.01	0.776248	0.610266
165	21.75	93.26	31.5	30.98	32.69	17.71	34.61	49.37	39.93	15.91	18.23	42.28	8.57	8.47	11.52	7.53	104	57.22	169.32	111.18	114.82	0.81859	0.550192
172	21.17	92.15	30.32	28.01	35.22	14.89	35.19	44.49	38.02	19.78	19.45	46.22	8.31	7.51	12.79	12.15	108.27	66.24	172.75	83.94	111.83	0.761359	0.611804
178	21	92.7	29.9	32	34	15.1	37.31	44.95	38.44	14.08	20.83	48.11	7.88	11.81	11.94	11.9	110	63.95	176.86	102.75	103.58	0.775514	0.581364
179	22.08	98.72	31.47	32.73	36.32	16.39	35.8	49.5	39.47	14.3	20.26	47.28	10.52	13.83	8.21	9.21	109.04	62.11	171.04	98.5	108.84	0.757191	0.569607
180	21.25	94.23	30.21	31.47	35.47	15.3	35.59	43.6	37.65	16.2	20.31	46.07	11.33	12.6	10.37	11.37	100.67	59.41	163.78	106.31	118.27	0.77252	0.590146
181	21.58	90.82	29.25	30.86	32.83	20.21	41.47	47.56	41.48	19.1	22.88	48.53	9.77	12.1	12.31	12.88	117.62	72.31	172.45	88.36	104.26	0.854523	0.614776
182	20	94.47	32.17	31.99	32.93	18.32	39.44	49.6	40.07	16.19	22.68	46.61	11.76	15.09	9.5	10.38	116.03	68.17	169.38	106.93	119.43	0.84617	0.58752
183	20	90.39	29.07	28.83	33.43	14.5	30.08	47.67	40.42	14.39	21.58	48.49	11.18	13.37	10.35	7.27	104.29	59.44	168.72	96.96	113.65	0.620334	0.569949
184	20	90.61	29.7	29.9	32.47	15.89	35.14	48.85	42.26	17.43	21.42	50.07	11.02	12.54	11.4	12.34	108	62.07	163.76	105.46	122.67	0.701817	0.574722
185	20	91.87	29.25	31.21	34.06	18.14	36.68	46.06	36.24	18.46	20.81	48.28	11.13	11.31	10.12	7.43	109.47	65.65	167.61	120.05	109.19	0.759735	0.599708
187	20	92.58	29.95	27.64	36.14	15.18	36.97	46.39	40.16	15.97	24.42	46.66	11.68	13.06	13.53	10.27	109.51	67.17	161.57	103.21	123.34	0.792327	0.613369
201	25.75	97.48	30.42	29.33	39.2863	15.1	39.2	49.65	43.71	20.64	20.3	50.49	10.84	10.43	10.79	9.41	109.02	62.88	161.86	106.59	122.44	0.776391	0.576775
204	22.83	90.6451	29.0748	28.9689	34.0161	16.3192	39.2128	57.6803	53.0848	18.0941	21.9115	51.7865	9.07889	13.0658	10.0418	8.31099	124.513	69.2901	173.281	87.0299	109.776	0.757201	0.556489
226	27.67	101.417	33.7805	31.5959	40.7122	16.1524	37.6419	54.6037	47.0819	19.1307	23.7357	52.074	10.3313	14.0908	11.1452	11.6532	128.205	75.6991	172.5	98.2319	114.06	0.722854	0.590454
227	20.25	90.6019	29.0505	30.06	33.4556	16.3192	36.3136	51.3501	42.4804	18.7809	18.541	46.749	10.0889	10.1673	10.3274	10.2283	111.188	60.5874	178.257	96.4569	103.072	0.776778	0.54491
228	23.58	96.4697	31.2834	30.7069	36.1186	16.498	38.3199	53.5316	47.1964	18.72	21.1462	51.7483	11.5555	12.9103	9.84027	10.3964	121.833	69.0642	178.569	90.905	107.58	0.740505	0.566876
229	22.25	90.2635	30.6533	29.6913	33.0262	18.1437	36.6716	52.9005	43.4633	15.864	18.3383	44.9288	10.549	10.3358	9.22391	9.11768	109.22	58.1389	166.885	110.221	115.787	0.816216	0.53231
247	28.83	92.6123	28.8006	29.534	36.7778	19.1191	38.4274	50.4034	41.7402	16.7007	21.9587	49.5758	10.9314	12.9613	11.2596	11.3694	112.708	64.9356	166.5	97.1914	107.993	0.775124	0.57614
293	21.67	89.814	28.9493	28.9162	33.8458	17.3994	38.6205	51.5569	43.3755	19.0791	22.7189	48.3826	10.9747	14.1078	11.0807	9.50728	115.4	65.7294	174.856	96.5776	104.402	0.798231	0.569579
294	21.25	88.6492	28.9628	29.698	31.3262	16.025	35.591	53.2959	44.1382 m	17.1854	20.4836	46.378	9.64603	10.8184	10.8292	8.77061	112.804	60.9077	171.69	106.562	114.481	0.767411	0.539943
298	21.42	98.979	32.8007	37.3222	34.1498	17.0473	36.8558	50.5219	42.195	18.3172	18.1571	49.0982	9.48176	9.70554	10.7438	8.16959	110.666	62.1794	172.054	96.5997	111.713	0.750655	0.561865
Mean	23.152	92.0443	29.3836	29.3866	35.0818	16.0574	36.4781	48.7861	41.6314	17.1068	21.2991	48.0613	10.2969	12.662	10.295	9.83677	111.46	65.1271	169.147	101.951	112.222	0.758991	0.584309
StdDev	2.3947	3.24392	1.70401	1.63709	2.49501	1.72091	2.43244	3.47603	3.575	1.83025	1.80743	2.75195	1.41382	1.9651	1.70243	1.7854	5.41734	4.34957	4.65195	9.86707	6.69875	0.883899	0.802897
